# Supplementary material for: Multivariate optimization, preconcentration and determination of mercury ions with (1-(p-acetyl phenyl)-3-(o-methyl benzoate)) triazene in aqueous samples using ICP-AES
Source: Royal Society of Chemistry journal article supplement (doi:10.1039/c5ay03169a), 2016-01-01
Supplement: c5ay03169a2.pdf [file c5ay03169a2.pdf]

**Table 1 S** Tolerance limit of interfering ions

| Coexisting ions                  | Ratio [Coexisting ions]/[Hg] | Relative Recovery (%) |
|----------------------------------|------------------------------|-----------------------|
| Na <sup>+</sup>                  | 1000                         | 98                    |
| K <sup>+</sup>                   | 1000                         | 92                    |
| Ca <sup>2+</sup>                 | 1000                         | 99                    |
| Mg <sup>2+</sup>                 | 1000                         | 103                   |
| Cr <sup>3+</sup>                 | 1000                         | 110                   |
| Mn <sup>2+</sup>                 | 1000                         | 98                    |
| Co <sup>2+</sup>                 | 1000                         | 105                   |
| Ni <sup>2+</sup>                 | 1000                         | 110                   |
| Cu <sup>2+</sup>                 | 1000                         | 99                    |
| Zn <sup>2+</sup>                 | 1000                         | 104                   |
| Pb <sup>2+</sup>                 | 1000                         | 109                   |
| Cd <sup>2+</sup>                 | 200                          | 95                    |
| Fe <sup>2+</sup>                 | 100                          | 93                    |
| Ag <sup>+</sup>                  | 1000                         | 110                   |
| Cl <sup>-</sup>                  | 1000                         | 99                    |
| NO <sub>3</sub> <sup>-</sup>     | 1000                         | 99                    |
| SO <sub>4</sub> <sup>2-</sup>    | 1000                         | 101                   |
| CH <sub>3</sub> COO <sup>-</sup> | 1000                         | 100                   |
