# Supplementary figures and images for: Multivariate optimization, preconcentration and determination of mercury ions with (1-(p-acetyl phenyl)-3-(o-methyl benzoate)) triazene in aqueous samples using ICP-AES
Source: Royal Society of Chemistry journal article supplement (doi:10.1039/c5ay03169a), 2016-01-01

**Fig. 1 S** Effect of sample volume on extraction recovery

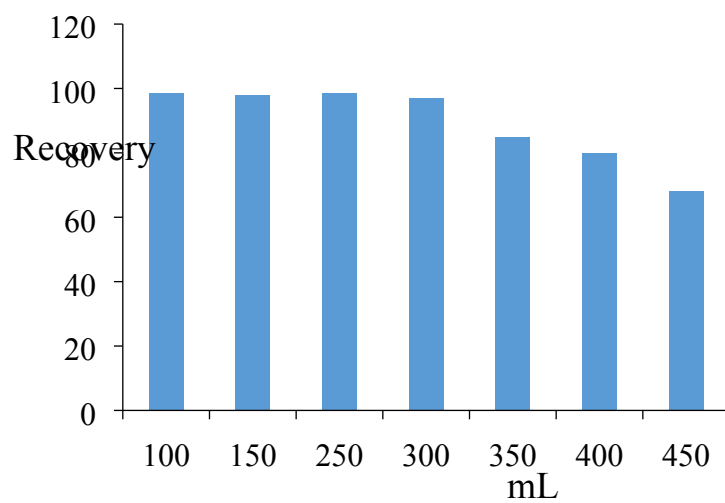

Fig. 1S

Supplement: c5ay03169a1.pdf [file c5ay03169a1.pdf]
